# Supplementary material for: GC Insights: Identifying conditions that sculpted bedforms – human insights to building an effective AI (artificial intelligence)
Source: Copernicus journal article supplement (doi:10.5194/gc-5-11-2022), 2022-01-06
Supplement: Supplementary file 2 [file Survey_Answers_Q3-5_1.0.xlsx]

## Sheet: Answers
	CORRECT ANSWERS						= Correct answer most frequent
	Q3: Environments: Individual Bedforms						Q4: Environments: Trains of Bedforms						Q5: Flow Regimes: Fluvial bedforms
	(randomised order)						(randomised order)
														Bedforms A to C
	3.1	Fluvial		Fluvial =	7		4.1	Glacial		Fluvial =	4			1 = lowest flow, 3 is highest
	3.2	Glacial		Glacial =	7		4.2	Aeolian		Glacial =	3
	3.3	Fluvial		Marine =	8		4.3	Marine		Marine =	3			A	B	C
	3.4	Marine		Aeolian =	12		4.4	Fluvial		Aeolian =	3		5.1	2	3	1
	3.5	Fluvial					4.5	Marine					5.2	1	2	3
	3.6	Aeolian					4.6	Glacial					5.3	2	1	3
	3.7	Aeolian					4.7	Fluvial					5.4	2	1	3
	3.8	Aeolian					4.8	Fluvial					5.5	1	2	3
	3.9	Marine					4.9	Fluvial					5.6	3	2	1
	3.10	Glacial					4.10	Marine
	3.11	Aeolian					4.11	Aeolian
	3.12	Glacial					4.12	Aeolian
	3.13	Aeolian					4.13	Glacial
	3.14	Aeolian
	3.15	Glacial
	3.16	Glacial
	3.17	Marine
	3.18	Marine
	3.19	Aeolian
	3.20	Fluvial
	3.21	Glacial
	3.22	Glacial
	3.23	Aeolian
	3.24	Fluvial
	3.25	Aeolian
	3.26	Aeolian
	3.27	Marine
	3.28	Marine
	3.29	Marine
	3.30	Aeolian
	3.31	Marine
	3.32	Fluvial
	3.33	Fluvial
	3.34	Aeolian
