# Supplementary material for: GC Insights: Identifying conditions that sculpted bedforms – human insights to building an effective AI (artificial intelligence)
Source: Copernicus journal article supplement (doi:10.5194/gc-5-11-2022), 2022-01-06
Supplement: Supplementary file 3 [file Survey_Data_Clean_1.1.xlsx]

## Sheet: Clean_extract
	Results of Quiz
							Q3 - Which environment is this individual bedform from? [Correct answers in row 5, 1 == correct, 0 == incorrect]																																				Q4 - Which environment is this bedform sequence from? [Correct answers in row 5, 1 == correct, 0 == incorrect]
	Participant ID	Consent	Years experience in researching bedforms	Number environments any familiarity with	Number environments well aquainted with	Geoscientist? [1st 13 at workshop]	Fluvial	Glacial	Fluvial	Marine	Fluvial	Aeolian	Aeolian	Aeolian	Marine	Glacial	Aeolian	Glacial	Aeolian	Aeolian	Glacial	Glacial	Marine	Marine	Aeolian	Fluvial	Glacial	Glacial	Aeolian	Fluvial	Aeolian	Aeolian	Marine	Marine	Marine	Aeolian	Marine	Fluvial	Fluvial	Aeolian	What, if anything, makes you feel confident?	Would contextual information help?	Glacial	Aeolian	Marine	Fluvial	Marine	Glacial	Fluvial
		Q1.1	Q2.1	Q2.2	Q2.3	Q2.4	Q3.1	Q3.2	Q3.3	Q3.4	Q3.5	Q3.6	Q3.7	Q3.8	Q3.9	Q3.10	Q3.11	Q3.12	Q3.13	Q3.14	Q3.15	Q3.16	Q3.17	Q3.18	Q3.19	Q3.20	Q3.21	Q3.22	Q3.23	Q3.24	Q3.25	Q3.26	Q3.27	Q3.28	Q3.29	Q3.30	Q3.31	Q3.32	Q3.33	Q3.34	Q3.35	Q3.36	Q4.1	Q4.2	Q4.3	Q4.4	Q4.5	Q4.6	Q4.7
	1	1	1	1	0	1	1	0	0	0	0	0	0	1	0	1	0	0	0	0	0	0	0	0	1	0	1	0	0	0	0	1	0	1	0	0	0	0	1	1	Smoothness of shape	No	1	1	1	1	0	0	0
	2	1	1	2	2	1	0	0	1	0	0	0	1	0	1	1	1	0	0	1	0	0	1	1	1	0	1	1	0	0	1	0	1	1	0	0	0	0	0	1	Pattern	Scale	1	1	1	1	0	0
	3	1	25	2	1	1	1	0	0	0	0	0	1	0	0	1	1	0	0	1	0	1	1	1	0	0	0	0	0	1	1	0	0	0	0	0	1	0	0	1	Asymmetry suggests a current but beyond that I cannot confidently identify the environment	Scale would probably help	0	1	1	1	0	0	0
	4	1	10	2	1	1	0	0	0	0	0	1	0	0	0	0	0	0	1	0	0	1	0	0	0	0	0	1	0	0	1	0	1	0	0	0	1	0	0	0	Absolutely not confident, I know about marine and river bedforms and I know it is not possible to differentiate them looking only at their shape	yes, scale would definitely help! Also flow direction	1	0	0	0	0	0	1
	5	1	8	3	1	1	1	0	1	0	1	0	0	0	0	0	0	0	0	0	0	0	0	0	0	1	0	0	0	1	0	0	0	0	0	0	0	1	1	0	NA	NA	1	1	0	1	0	0	1
	6	1	0	4	2	1	0	0	0	0	0	1	0	1	0	0	0	0	0	0	0	0	1	1	1	1	1	0	0	0	1	0	0	1	0	1	0	0	0	0	Small-scale, sporadic changes in profile	Yes, this information would help.	1	1	1	1	1	1	1
	7	1	0	4	1	1	1	1	0	0	1	0		0	1			1	0	0	1	1	0	0	1		0	0	0	0	0	0	0	0	1	0	0	0	1	1	By the end I was selecting almost at random!	Yes, would be hugely helpful	0	1		0	1	0	0
	8	1	10	4	4	1	1	0	0	0	0	1	0	0	1	0	0	0	0			0	1	1	0	0	0	0	0	1	0	0	1	0	0	1	1	0	0	0	Superimposed topography, rounded tops	Ensure same resolution - not necessariliy scale	1	0	0	1	0	1	1
	9	1	0	1	1	1	0	0	0	0	0	1	0	1	0	0	0	0	0	0	0	0	0	0	0	0	0	1	1	0	0	1	0	1	0	0	0	0	1	1	From the example graphs: - Fluvial has an apparently directional distortion to a reasonably regular and simple spectra - Marine has high frequency components superimposed over relativity low frequency major components - Aeolian appears to be reliably periodic with relatively small spectral distribution - Glacial seems to have irregular features Aeolian and Glacial seem more difficult to reliably …	Don't know	1	1	1	0	1	0	1
	10	1	1	4	1	1	1	0	0	1	0	0	0	1	0	1	1	0	1	1	0	0	0	0	0	0	0	0	0	0	1	0	0	1	0	0	0	0	0	0	symmetry and number of scales evident	Yes	0	0	0	0	0	1	0
	11	1	0	1	0	1	1	0	0	0	0	0	1	0	0	0	0	0	1	1	0	1	0	0	0	0	0	1	0	1	1	0	0	1	0	0	0	0	0	1	0	Yes, flow direction and train of bedforms instead of isolated ones	1	1	1	0	0	0	0
	12	1	2	4	1	1	0	0	1	1	1	1	0	1	0	1	0	0	0	0	0	0	0	1	1	0	1	0	0	1	0	0	0	1	1	0	0	0	0	0	Form of the vertex	It's too hard to say	0	0	1	1	1	1	1
	13	1	0	0	0	1	1	0	1	0	0	0	0	0	1	0	0	0	1	1	0	0	0	0	1	0	0	0	0	1	1	0	0	0	1		1		0	1	Shape of the major feature and nature of perturbations if present.	Scale would definitely help.	0	1	0	0	0	1	0
	14	1	0	0	0	0	0	1			0	1	0	1	1	0	0	0	1	1	0	0	0	0	1	0	0	1	0	1	0	0	0	1	0	1	1	0	0	0	Depth of rises and falls	Scale	0	0	1	1	1	0	0
	15	1	0	0	0	0	1	0	0	0	0	0	1	0	1	1	0	0	1	0	0	0	1	1	0	1	0	1	0	1	0	0	0	0	0	1	0	0	0	0	Studying the initial shapes helped me to provide an educated guess	Scale would be helpful, as would seeing the examples alongside each aspect for comparison.	0	0	0	1	0	1	1
	16	1	0	0	0	0	0	0	0	0	0	1	0	1	0	1	0	0	1	1	0	1	0	0	0	0	0	0	0	1	0	0	0	0	0	1	0	1	0	1	Trend of the plots	I think it would help	0	0	1	0	1	0
	17	1	0	1	0	0	0	0	1	0	0	1	1	0	0	0	1	0	0	0	0	0	0	0	1	1	0	1	0	0	0	1	0	0	0	1	0	0	0	1	Some look very similar so end up trying to decide between two usually. The shape and erratic behaviour of some make it feel more like one than the rest. For example rapid drops look more like river than any other, but then with such small snippets of slow rises and decreases, can look like either glacial or aeolian. Where as erratic ones, that on average stay level, are more marine	Potentially, as flow direction and scale of a river compare to a glacial area. Smaller scale, but a more direct flow. I personally think scale or something that can define the size of the bedroom.	1	1	1	0	1	1	1
	18	1	0	0	0	0	0	0	0	0	0	0	1	1	0	0	0	1	0	0	0	0	0	0	0	0	0	0	0	0	1	0	0	1	0	0	0	0	0	0	No confidence at all	Scale would a great help	0	1	0	0	0	0	0
	19	1	0	0	0	0	0	0	0	1	0	0	1	0	0	0	1	0	0	0	0	1	0	0	1	0	0	0	0	0	1	0	0	1	0	1	0	0	0	0	The earlier examples	It would help	0	1	0	1	0	0	0
	20	1	0	0	0	0	1	0	0	0	0	1	0	1	0	0	0	0	1	1	0		1	1	1	1	0	1	0	0	1		0	1	0	0	1	0	0	1	types of frequency and noise levels	scale. units. axes. labels.	1	1	1	1	1	1	1
	21	1	0	0	2	0	1	0	0	1	1	1	0	0	0	0	0	0	1	1	0	0	0	0	0	1	0	1	0	0	1	0	0	0	1	0	1	0	0	0	0	Flow direction and scale, and geographical location	1	1	1	0	0	1	1
	22	1	0	0	0	1	0	0		0	1	1	0	0	0	1	1	0	1	0	1	0	1	0	0	1	0	0	0	1	1	0	0	0	1	1	0	0	0	1	Trying to match the shape and 'noisiness' of the exemplars (should 'River' be 'Fluvial' by the way?)	ermmm, no. :-(	0	0	1	0	0	0	1
	23	1	0	0	0	0	0	0	0	0	1	0	1	0	0	0	0	0	1	1	0	0	1	1	0	0	1	0	0	0	0	0	0	0	0	0	0	0	0	0	0	Scale	1	1	1	0	1	0	1
	24	1	0	4	2	1	0	0	1	1	0	0	1	0	1	1	1	0	0	0	0	0	0	1	1	0	1	0	0	1	0	0	1	0	0	1	1	0	0	0	Not confident at all! Hoped smoother looking ones might be glacial, otherwise, guesses more than anything!	More context would help, but still difficult to judge!	0	1	0	0	0	1	1
	25	1	0	2	1	1	1	1	0	0	0	0	1	0	1	1	0	0	1	0	0	1	0	1	1	1	0	1	0	0	1	0	0	1	0	0	0	0	0	0	in some, rising and falling limb angles and shapes *suggest* possible process drivers but it is difficult without proper scale	In some cases yes						0	0
	26	1	0	0	0	0	0	1	1	0	0	0	0	0	0	0	1	0	0	1	0	0	0	1	0	1	0	1	0	0	0	1	0	1	0	1	0	0	0	0	zig zags are (perhaps deceivingly) the most visible giveaway	Not without some proper reading into geomorphology first	1	1	1	0	1	1	1
	27	1	20	4	1	1	0	0	0	0	0	1	0	1	0	0	0	1	0	0	1	1	0	0	1	0	1	1	0	1	0	0	0	0	0	0	0	0	1	0	Without scale or context, I have virtually no confidence, but I considered (i) asymmetry between stoss and lee slopes, (ii) slope angles, and (iii) the presence/absence of superimposed bumps/bedforms nearby. Was the flow direction even stated? I assumed left to right)	Yes, flow direction and scale would definitely help.	1	1	0	0	1	1	1
	28	1	0	0	0	0	0	1	0	0	0	1	0						1	0	0	1	0	0	1	0	0	0	0	0	0	0	0	1	0	0	0	0	0	1	A vague idea of a key feature from each	It wouldn't help for me	1	1	0	0	0	0	0
	29	1	0	0	0	0	1	0	0	0	0	0	1	0	0	1	1	0	0	0	0	1	0	0	0	0	1	1	0	0	0	0	0	1	0	0	0	0	0	0	Nothing	No	1	0	1	1	0	1	0
	30	1	3	2	1	1	1	0	0	1	1	1	0	0	0	1	0	0	1	1	0	0	0	0	1	1	0	0	0	1	0	1	0	0	0	1	0	0	0	1	I'm not super confident with my decisions but I was mainly looking at symmetry and the amount and relative heights of peaks and troughs	I believe scale would help significantly	1	1	1	0	1	1	1
	31	1	0	0	0	0	0	1	1	0	0	1	0	0	1	0	0	0	1	1	0	0	1	1	0	1	0	1	0	1	1	0	0	1	0	0	0	0	0	1	I used the smoothness vs jaggedness of the shape and the overall variability compared to the examples.	I know nothing at all about the topic covered, so some contexts would be useless - I'm working entirely from abstract line shapes, so some context such as flow direction would probably be of little use. However scale (especially comparing the questions to the examples would help - in a number of cases it seemed that the question image might have been a small fraction of the example - knowing if t…	1	1	0	0	0	0	1
	32	1	0	0	0	0	1	1	1	0	0	1	1	0	1	1	0	0	1	0	0	0	1	1	0	0	0	0	0	0	0	1	0	1	0	1	0	0	0	0	Patterns of smoothness of curve and steep or sharp incline in curve compared to agitated sharp changes over short or longer lengths.	Scale would be most helpful.	1	1	0	0	0	1	0
	33	1	0	0	0	0																																			0	0
	34	1	0	0	0	0	1	1	1	0	1	1	0	1	0	0	0	0	1	1	0	0	0	0	1	1	0	0	0	0	1	1	0	0	0	0	0	0	0	1	0	Sure	0	1	1	1	1	1	1
	35	1	3	2	2	1	0	0	0	0	1	1	0	1	1	1	0	0	0	0	0	0	0	1	1	1	1	0	0	1	0	1	0	1	0	1	0	0	0	1	Aeolian and Glacial bedforms seem to be smooth while Fluvial and Marine are rougher. Aeolian is consistently symmetrical while Glacial can be asymmetric or symmetric. Difficult to tell Fluvial and Marine apart, Fluvial may have more relief change over shorter distances.	Yes that would be very helpful	1	1	1	1	1	1	1
	36	1	0	1	0	1	0	0	0	0	0	0	0	0	0	1	1	0	0	0	0	0	0	0	0	0	0	0	0	0	1	0	0	0	0	0	0	0	0	0	Generally read them as flow travelling left to right, then looked at where it was steepest	Flow direction would help for sure	1	0	0	0	0	1	1
	37	1	0	2	1	1	1	1		0	0	0	1	0	0	0	0	1	1	1	1	0	0																		I have no confidence	Scale needed	0	1	0	0	0	1	1
	38	1	25	4	2	1	0	0	0	0	1	0	1	0	0	1	0	0	1	1	0	0	0	1	0	0	0	1	0	1	1	0	0	0	1	0	0	0	0	1	elongation, roughness, smoothness	scale	0	0	0	0	0	0	1
	39	1	20	2	1	1	0	0	0	0	1	0	1	0	0	1	1	0	0	0	0	1	0	0	0	0	0	1	0	0	0	0	0	1	0	1	0	0		0	Rounder shapes being associated with glacial bedforms. Evidence of superimposed bedforms (ripples) suggesting fluvial or marine.	Flow direction (or wind regime for aeolian) and scale would certainly help	1	1	1	0	0	1	1
	40	1	25	2	3	1	1	1	0	0	0	1	0	1	1	1	0	0	0	0	0	1	1	1	1	1	0	1	0	0	1	0	1	0	0	0	1	0	0	1	I'm dubious about all my answers. I don't believe the profile is sufficient information to make an accurate decision	Flow direction would help, as would grain size and scale	0	0	1	0	0	1	1
	41	1	25	2	3	1	1	1	0	0	0	1	0	1	1	1	0	0	0	0	0	1	1	1	1	1	0	1	0	0	1	0	1	0	0	0	1	0	0	1	I'm dubious about all my answers. I don't believe the profile is sufficient information to make an accurate decision	Flow direction would help, as would grain size and scale	0	0	1	0	0	1	1
	42	1	0	0	0	0	1	0	0	0	1	0	0	1	0	1	0	0	1	1	0	1	0	1	1	1	1	1	0	0	1	0	0	1	1	0	0	0	0	0	0	Yes	1	1	1	0	0	0	1
[truncated: 28 more columns]
