# Supplementary material for: GC Insights: Identifying conditions that sculpted bedforms – human insights to building an effective AI (artificial intelligence)
Source: Copernicus journal article supplement (doi:10.5194/gc-5-11-2022), 2022-01-06
Supplement: Supplementary file [file gc-5-11-2022-supplement-title-page.pdf › gc-5-11-2022-supplement-title-page.pdf]

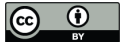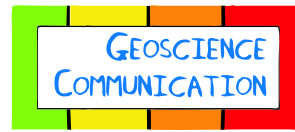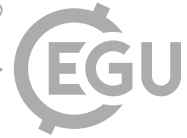

## *Supplement of*

# **GC Insights: Identifying conditions that sculpted bedforms – human insights to building an effective AI (artificial intelligence)**

**John K. Hillier et al.**

*Correspondence to:* John K. Hillier ([j.hillier@lboro.ac.uk](mailto:j.hillier@lboro.ac.uk))

- gc-5-11-2022-supplement-title-page.pdf
- .DS\_Store
- Data\_ANN
  - .DS\_Store
  - P1.dzf
  - P1.properties
  - P1\_SWT.pdf
  - P2.dzf
  - P2.properties
  - P2\_SWT.pdf
  - P3.dzf
  - P3.properties
  - P3\_SWT.pdf
  - P4.dzf
  - P4.properties
  - P4\_SWT.pdf
  - P\_ALL.stats
  - README\_HW\_data\_1.1.docx
- Pseudo-code\_ANN\_1.1.rtf
- Survey\_1.0.pdf
- Survey\_Answers\_Q3-5\_1.0.xlsx
- Survey\_Data\_Clean\_1.1.xlsx

The copyright of individual parts of the supplement might differ from the article licence.
