# Supplementary figures and images for: GC Insights: Identifying conditions that sculpted bedforms – human insights to building an effective AI (artificial intelligence)
Source: Copernicus journal article supplement (doi:10.5194/gc-5-11-2022), 2022-01-06

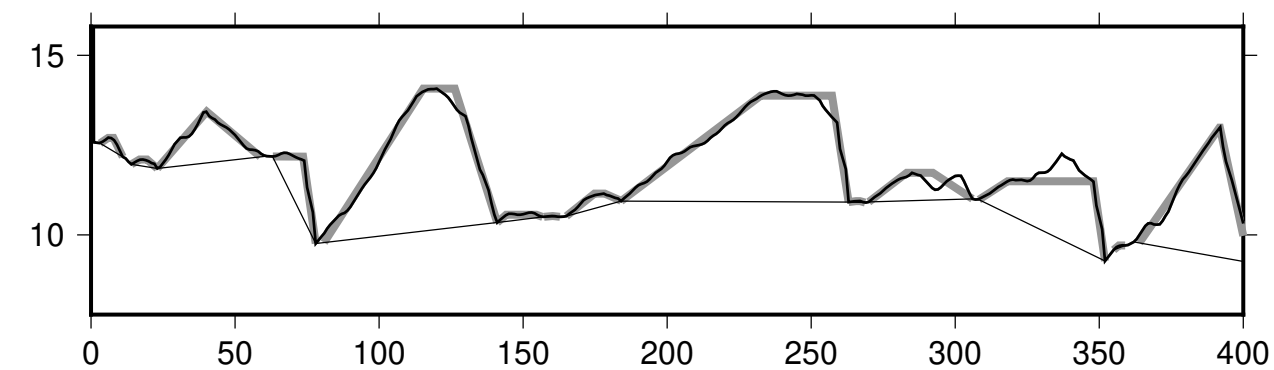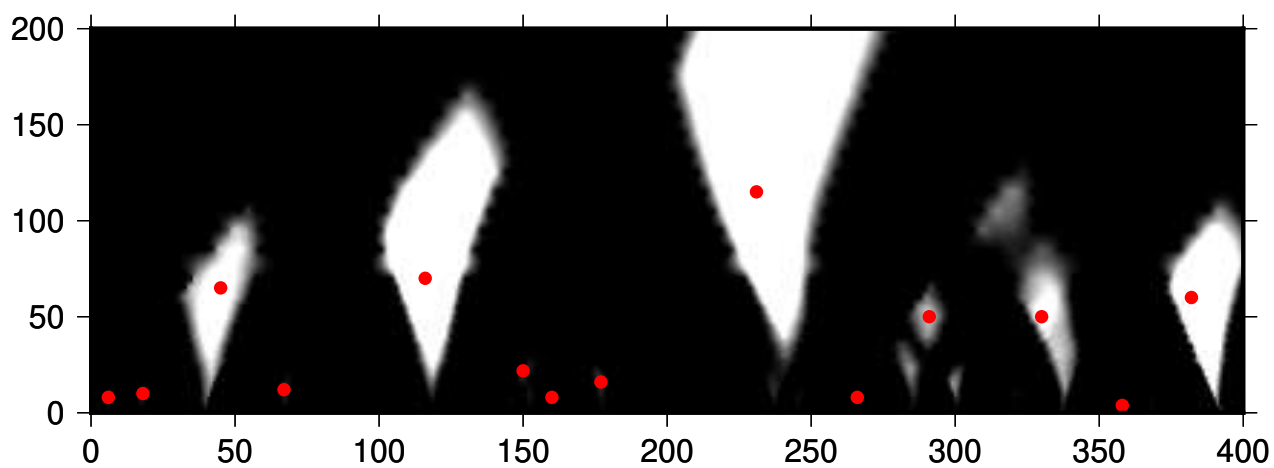

Supplement: Supplementary file 1 [file P1_SWT.pdf › Data_ANN/P1_SWT.pdf]

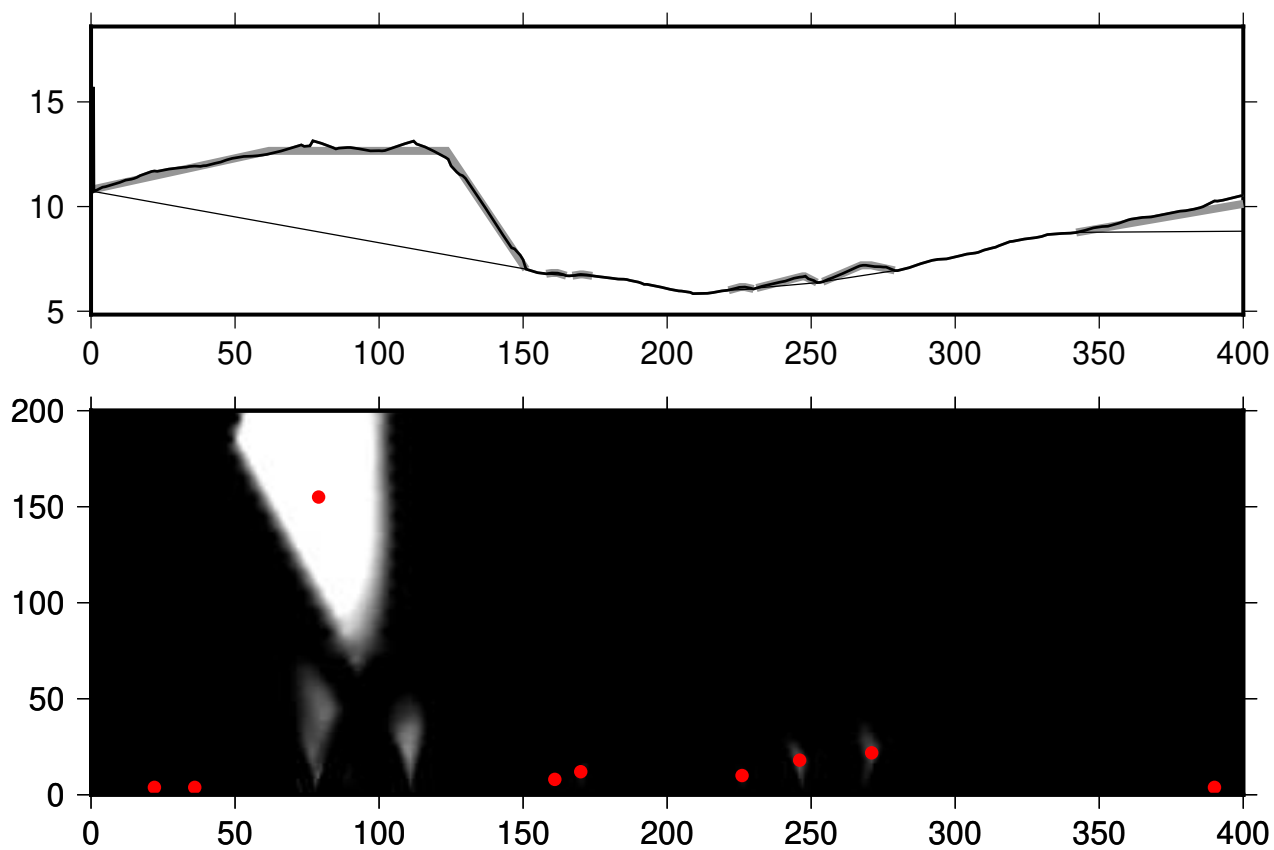

Supplement: Supplementary file 2 [file P2_SWT.pdf › Data_ANN/P2_SWT.pdf]

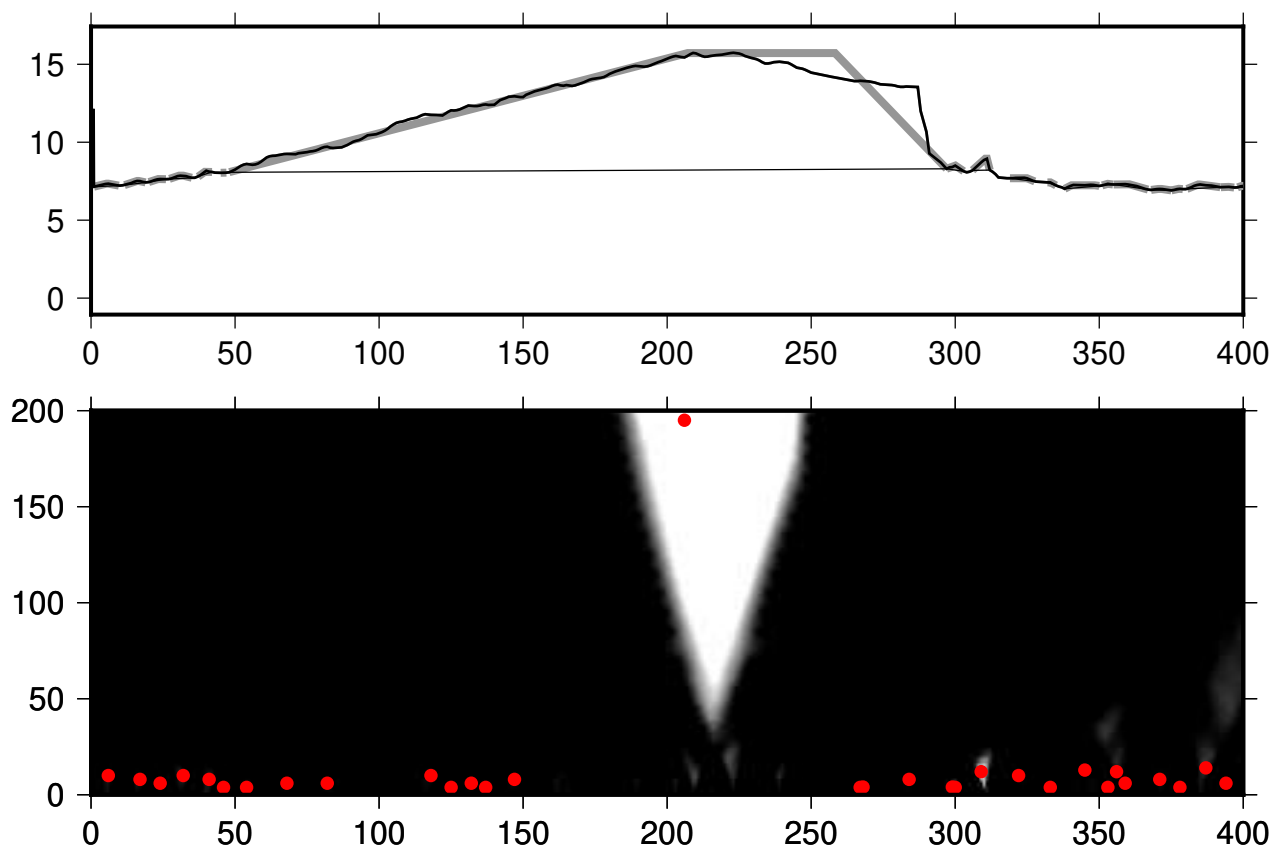

Supplement: Supplementary file 3 [file P3_SWT.pdf › Data_ANN/P3_SWT.pdf]

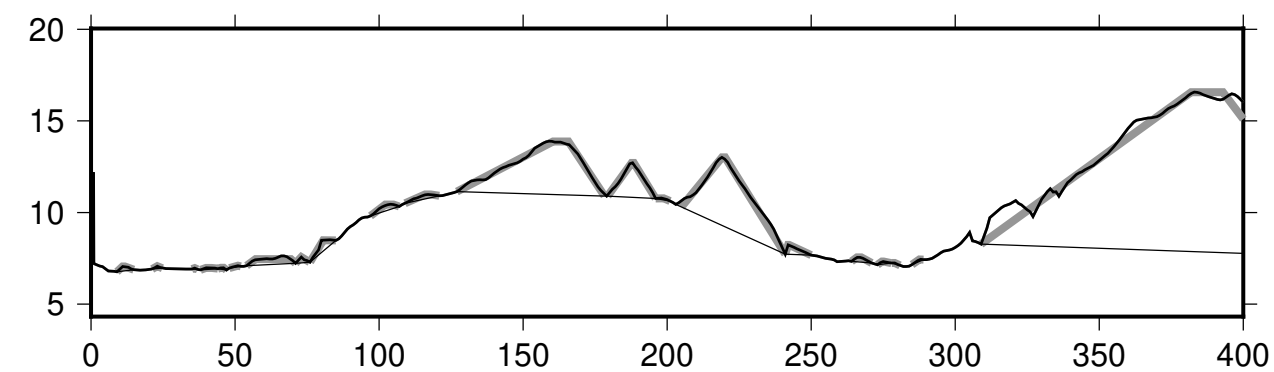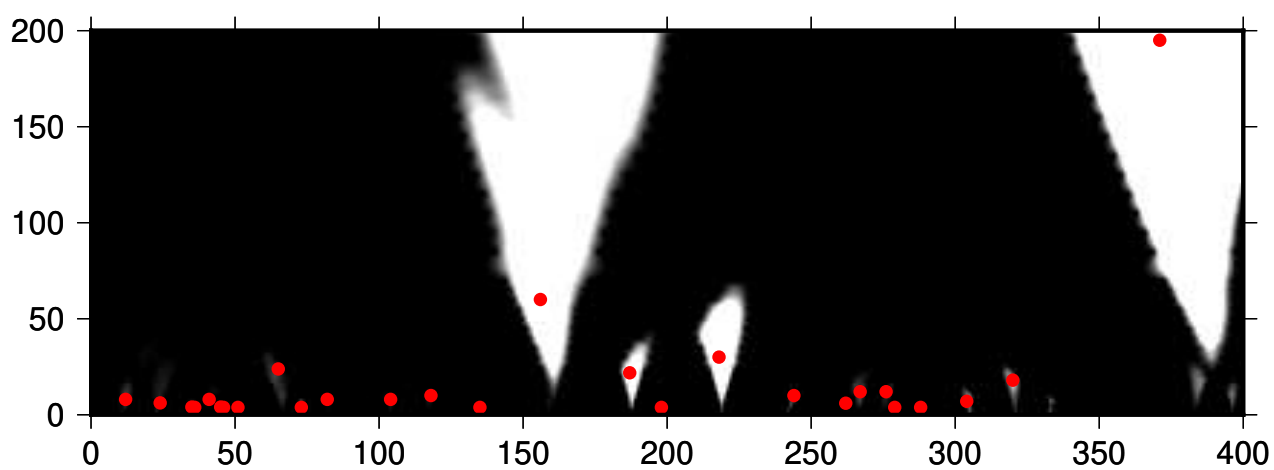

Supplement: Supplementary file 4 [file P4_SWT.pdf › Data_ANN/P4_SWT.pdf]
